# Supplementary material for: Kinetics of OH + SO 2 + M: temperature-dependent rate coefficients in the fall-off regime and the influence of water vapour
Source: Copernicus journal article supplement (doi:10.5194/acp-22-4969-2022), 2022-04-14
Supplement: Supplementary file 1 [file acp-22-4969-2022-supplement.pdf]

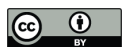

*Supplement of*

## **Kinetics of OH + SO<sub>2</sub> + M: temperature-dependent rate coefficients in the fall-off regime and the influence of water vapour**

**Wenyu Sun et al.**

*Correspondence to:* John N. Crowley ([john.crowley@mpic.de](mailto:john.crowley@mpic.de))

The copyright of individual parts of the supplement might differ from the article licence.

**Table S1.** Values of  $k_1$  measured in  $N_2$  bath gas.

| $p$ (Torr) | $T$ (K) | M<br>( $\times 10^{18}$ molecule $cm^{-3}$ ) | precursor                     | $[OH]_0$<br>( $\times 10^{11}$ molecule $cm^{-3}$ ) | $k_1$<br>( $\times 10^{-13}$ $cm^3$ molecule $^{-1}$ s $^{-1}$ ) |
|------------|---------|----------------------------------------------|-------------------------------|-----------------------------------------------------|------------------------------------------------------------------|
| 26.8       | 220     | 1.18                                         | HNO <sub>3</sub>              | 4.4                                                 | 4.57 $\pm$ 0.14                                                  |
| 39.9       |         | 1.75                                         | HNO <sub>3</sub>              | 2.3                                                 | 5.58 $\pm$ 0.31                                                  |
| 65.2       |         | 2.86                                         | HNO <sub>3</sub>              | 0.7                                                 | 7.25 $\pm$ 0.18                                                  |
| 89.6       |         | 3.93                                         | HNO <sub>3</sub>              | 1.4                                                 | 8.29 $\pm$ 0.48                                                  |
| 121.1      |         | 5.31                                         | HNO <sub>3</sub>              | 0.9                                                 | 9.46 $\pm$ 0.28                                                  |
| 151.4      |         | 6.64                                         | HNO <sub>3</sub>              | 0.9                                                 | 9.97 $\pm$ 0.53                                                  |
| 181.5      |         | 7.96                                         | HNO <sub>3</sub>              | 1.3                                                 | 10.82 $\pm$ 0.58                                                 |
| 222.5      |         | 9.76                                         | HNO <sub>3</sub>              | 4.2                                                 | 11.06 $\pm$ 0.46                                                 |
| 301.1      |         | 13.21                                        | HNO <sub>3</sub>              | 1.2                                                 | 12.07 $\pm$ 0.60                                                 |
| 400.4      |         | 17.57                                        | HNO <sub>3</sub>              | 1.5                                                 | 13.71 $\pm$ 0.41                                                 |
| 23.8       | 250     | 0.92                                         | HNO <sub>3</sub>              | 6.2                                                 | 3.11 $\pm$ 0.15                                                  |
| 45.0       |         | 1.74                                         | HNO <sub>3</sub>              | 5.0                                                 | 4.03 $\pm$ 0.29                                                  |
| 74.4       |         | 2.87                                         | HNO <sub>3</sub>              | 3.7                                                 | 5.43 $\pm$ 0.23                                                  |
| 98.7       |         | 3.81                                         | HNO <sub>3</sub>              | 5.0                                                 | 6.32 $\pm$ 0.40                                                  |
| 130.0      |         | 5.02                                         | HNO <sub>3</sub>              | 5.9                                                 | 7.24 $\pm$ 0.42                                                  |
| 160.4      |         | 6.19                                         | HNO <sub>3</sub>              | 7.8                                                 | 8.21 $\pm$ 0.19                                                  |
| 195.5      |         | 7.55                                         | HNO <sub>3</sub>              | 6.0                                                 | 8.96 $\pm$ 0.48                                                  |
| 243.2      |         | 9.39                                         | HNO <sub>3</sub>              | 5.8                                                 | 9.32 $\pm$ 0.48                                                  |
| 298.3      |         | 11.52                                        | HNO <sub>3</sub>              | 3.9                                                 | 9.68 $\pm$ 0.66                                                  |
| 398.7      |         | 15.40                                        | HNO <sub>3</sub>              | 3.6                                                 | 11.31 $\pm$ 0.42                                                 |
| 499.2      | 19.28   | HNO <sub>3</sub>                             | 3.4                           | 11.87 $\pm$ 0.67                                    |                                                                  |
| 23.6       | 273     | 0.83                                         | HNO <sub>3</sub>              | 5.1                                                 | 2.17 $\pm$ 0.07                                                  |
| 35.0       |         | 1.24                                         | H <sub>2</sub> O <sub>2</sub> | 4.3                                                 | 2.83 $\pm$ 0.12                                                  |
| 44.2       |         | 1.56                                         | HNO <sub>3</sub>              | 3.7                                                 | 3.26 $\pm$ 0.08                                                  |
| 58.9       |         | 2.08                                         | H <sub>2</sub> O <sub>2</sub> | 13.6                                                | 3.91 $\pm$ 0.26                                                  |
| 69.9       |         | 2.47                                         | H <sub>2</sub> O <sub>2</sub> | 2.9                                                 | 4.41 $\pm$ 0.24                                                  |
| 80.4       |         | 2.84                                         | HNO <sub>3</sub>              | 2.9                                                 | 4.70 $\pm$ 0.19                                                  |
| 98.5       |         | 3.48                                         | H <sub>2</sub> O <sub>2</sub> | 7.0                                                 | 5.02 $\pm$ 0.12                                                  |
| 108.8      |         | 3.85                                         | H <sub>2</sub> O <sub>2</sub> | 5.9                                                 | 5.15 $\pm$ 0.22                                                  |
| 121.3      |         | 4.29                                         | HNO <sub>3</sub>              | 6.2                                                 | 5.43 $\pm$ 0.19                                                  |
| 148.7      |         | 5.26                                         | H <sub>2</sub> O <sub>2</sub> | 4.5                                                 | 6.25 $\pm$ 0.34                                                  |
| 174.8      |         | 6.18                                         | HNO <sub>3</sub>              | 5.9                                                 | 6.64 $\pm$ 0.15                                                  |
| 216.4      |         | 7.65                                         | HNO <sub>3</sub>              | 5.0                                                 | 7.35 $\pm$ 0.27                                                  |
| 247.9      |         | 8.77                                         | H <sub>2</sub> O <sub>2</sub> | 6.6                                                 | 8.17 $\pm$ 0.40                                                  |
| 301.2      |         | 10.65                                        | H <sub>2</sub> O <sub>2</sub> | 9.3                                                 | 9.02 $\pm$ 0.35                                                  |
| 398.3      |         | 14.08                                        | H <sub>2</sub> O <sub>2</sub> | 11.4                                                | 10.25 $\pm$ 0.19                                                 |

|       |     |       |                               |      |              |
|-------|-----|-------|-------------------------------|------|--------------|
| 502.3 |     | 17.76 | H <sub>2</sub> O <sub>2</sub> | 15.2 | 10.72 ± 0.38 |
| 14.2  |     | 0.46  | H <sub>2</sub> O <sub>2</sub> | 5.8  | 1.30 ± 0.07  |
| 17.8  |     | 0.58  | H <sub>2</sub> O <sub>2</sub> | 3.2  | 1.49 ± 0.08  |
| 20.4  |     | 0.66  | HNO <sub>3</sub>              | 4.3  | 1.46 ± 0.04  |
| 22.1  |     | 0.72  | H <sub>2</sub> O <sub>2</sub> | 8.7  | 1.49 ± 0.06  |
| 30.5  |     | 0.99  | H <sub>2</sub> O <sub>2</sub> | 4.0  | 1.88 ± 0.02  |
| 43.5  |     | 1.41  | HNO <sub>3</sub>              | 4.2  | 2.24 ± 0.12  |
| 46.8  |     | 1.52  | H <sub>2</sub> O <sub>2</sub> | 2.1  | 2.46 ± 0.10  |
| 59.9  |     | 1.94  | H <sub>2</sub> O <sub>2</sub> | 4.7  | 2.97 ± 0.10  |
| 67.6  |     | 2.19  | HNO <sub>3</sub>              | 7.2  | 3.18 ± 0.14  |
| 74.8  |     | 2.42  | H <sub>2</sub> O <sub>2</sub> | 3.6  | 3.56 ± 0.15  |
| 97.9  |     | 3.17  | HNO <sub>3</sub>              | 2.4  | 3.74 ± 0.23  |
| 105.4 |     | 3.41  | H <sub>2</sub> O <sub>2</sub> | 2.5  | 4.06 ± 0.30  |
| 125.7 |     | 4.07  | H <sub>2</sub> O <sub>2</sub> | 5.9  | 4.01 ± 0.15  |
| 126.0 |     | 4.08  | H <sub>2</sub> O <sub>2</sub> | 4.4  | 4.20 ± 0.16  |
| 134.4 |     | 4.35  | H <sub>2</sub> O <sub>2</sub> | 3.6  | 4.70 ± 0.08  |
| 146.9 |     | 4.76  | H <sub>2</sub> O <sub>2</sub> | 4.2  | 4.88 ± 0.11  |
| 163.4 |     | 5.29  | H <sub>2</sub> O <sub>2</sub> | 2.3  | 5.50 ± 0.10  |
| 174.4 | 298 | 5.65  | H <sub>2</sub> O <sub>2</sub> | 3.0  | 5.45 ± 0.29  |
| 195.0 |     | 6.32  | H <sub>2</sub> O <sub>2</sub> | 3.6  | 5.54 ± 0.15  |
| 201.1 |     | 6.51  | HNO <sub>3</sub>              | 2.6  | 5.52 ± 0.21  |
| 247.5 |     | 8.02  | H <sub>2</sub> O <sub>2</sub> | 3.8  | 6.50 ± 0.31  |
| 298.6 |     | 9.67  | H <sub>2</sub> O <sub>2</sub> | 4.0  | 7.34 ± 0.24  |
| 299.0 |     | 9.69  | HNO <sub>3</sub>              | 3.5  | 6.87 ± 0.23  |
| 348.5 |     | 11.29 | H <sub>2</sub> O <sub>2</sub> | 8.5  | 7.35 ± 0.29  |
| 396.6 |     | 12.85 | H <sub>2</sub> O <sub>2</sub> | 7.5  | 7.58 ± 0.32  |
| 403.5 |     | 13.07 | HNO <sub>3</sub>              | 6.3  | 7.99 ± 0.32  |
| 453.2 |     | 14.68 | H <sub>2</sub> O <sub>2</sub> | 10.4 | 8.70 ± 0.19  |
| 503.4 |     | 16.31 | H <sub>2</sub> O <sub>2</sub> | 10.0 | 8.69 ± 0.26  |
| 510.3 |     | 16.53 | HNO <sub>3</sub>              | 6.1  | 9.02 ± 0.55  |
| 562.5 |     | 18.22 | H <sub>2</sub> O <sub>2</sub> | 9.4  | 9.45 ± 0.19  |
| 595.4 |     | 19.29 | HNO <sub>3</sub>              | 5.9  | 9.02 ± 0.98  |
| 612.4 |     | 19.84 | H <sub>2</sub> O <sub>2</sub> | 7.7  | 9.52 ± 0.17  |
| 652.7 |     | 21.14 | H <sub>2</sub> O <sub>2</sub> | 9.3  | 10.02 ± 0.32 |
| 698.7 |     | 22.63 | H <sub>2</sub> O <sub>2</sub> | 6.3  | 10.23 ± 0.41 |
| 725.0 |     | 23.49 | H <sub>2</sub> O <sub>2</sub> | 11.3 | 10.49 ± 0.42 |
| 742.0 |     | 24.04 | H <sub>2</sub> O <sub>2</sub> | 7.3  | 10.53 ± 0.41 |
| 30.6  | 333 | 0.89  | H <sub>2</sub> O <sub>2</sub> | 1.8  | 1.37 ± 0.06  |
| 49.4  |     | 1.43  | H <sub>2</sub> O <sub>2</sub> | 2.3  | 1.77 ± 0.11  |

|       |       |                               |      |             |
|-------|-------|-------------------------------|------|-------------|
| 78.6  | 2.28  | H <sub>2</sub> O <sub>2</sub> | 3.0  | 2.59 ± 0.23 |
| 100.7 | 2.92  | H <sub>2</sub> O <sub>2</sub> | 2.3  | 2.99 ± 0.10 |
| 134.7 | 3.90  | H <sub>2</sub> O <sub>2</sub> | 2.9  | 3.12 ± 0.17 |
| 165.5 | 4.80  | H <sub>2</sub> O <sub>2</sub> | 29.2 | 3.61 ± 0.32 |
| 198.9 | 5.77  | H <sub>2</sub> O <sub>2</sub> | 2.5  | 4.53 ± 0.13 |
| 252.4 | 7.32  | H <sub>2</sub> O <sub>2</sub> | 22.4 | 4.96 ± 0.12 |
| 301.5 | 8.74  | H <sub>2</sub> O <sub>2</sub> | 2.6  | 5.71 ± 0.18 |
| 350.0 | 10.15 | H <sub>2</sub> O <sub>2</sub> | 5.4  | 5.53 ± 0.46 |
| 398.7 | 11.56 | H <sub>2</sub> O <sub>2</sub> | 2.8  | 6.55 ± 0.44 |
| 449.1 | 13.02 | H <sub>2</sub> O <sub>2</sub> | 5.2  | 6.38 ± 0.48 |
| 499.5 | 14.48 | H <sub>2</sub> O <sub>2</sub> | 3.4  | 6.76 ± 0.24 |
| 597.4 | 17.32 | H <sub>2</sub> O <sub>2</sub> | 2.7  | 7.76 ± 0.31 |
| 702.7 | 20.37 | H <sub>2</sub> O <sub>2</sub> | 2.8  | 7.87 ± 0.21 |

---

**Table S2.** Values of  $k_1$  measured in N<sub>2</sub>-H<sub>2</sub>O bath gas.<sup>1</sup>

| $T$ (K) | $p$ (Torr) | M<br>(10 <sup>18</sup> molecule/cm <sup>3</sup> ) | [H <sub>2</sub> O]<br>(10 <sup>17</sup> molecule/cm <sup>3</sup> ) | $x_{\text{H}_2\text{O}}$ | $x_{\text{N}_2}$ | $k_1$<br>(10 <sup>-13</sup> cm <sup>3</sup> molecule <sup>-1</sup> s <sup>-1</sup> ) |
|---------|------------|---------------------------------------------------|--------------------------------------------------------------------|--------------------------|------------------|--------------------------------------------------------------------------------------|
| 273     | 49.3       | 1.74                                              | 0.00                                                               | 0.000                    | 1.000            | 3.42 ± 0.19                                                                          |
|         | 50.6       | 1.79                                              | 0.22                                                               | 0.012                    | 0.988            | 3.49 ± 0.15                                                                          |
|         | 49.5       | 1.75                                              | 0.28                                                               | 0.016                    | 0.984            | 3.52 ± 0.28                                                                          |
|         | 50.4       | 1.78                                              | 0.44                                                               | 0.024                    | 0.976            | 3.67 ± 0.25                                                                          |
|         | 49.9       | 1.76                                              | 0.54                                                               | 0.031                    | 0.969            | 3.69 ± 0.16                                                                          |
|         | 50.6       | 1.79                                              | 0.64                                                               | 0.036                    | 0.964            | 3.68 ± 0.32                                                                          |
|         | 50.5       | 1.79                                              | 0.84                                                               | 0.047                    | 0.953            | 3.81 ± 0.34                                                                          |
| 298     | 49.1       | 1.59                                              | 0.00                                                               | 0.000                    | 1.000            | 2.59 ± 0.10                                                                          |
|         | 49.5       | 1.60                                              | 0.31                                                               | 0.020                    | 0.980            | 2.71 ± 0.17                                                                          |
|         | 49.8       | 1.61                                              | 0.43                                                               | 0.027                    | 0.973            | 2.78 ± 0.07                                                                          |
|         | 50.3       | 1.63                                              | 0.77                                                               | 0.047                    | 0.953            | 2.94 ± 0.13                                                                          |
|         | 50.6       | 1.64                                              | 1.14                                                               | 0.070                    | 0.930            | 3.03 ± 0.13                                                                          |
|         | 50.3       | 1.63                                              | 1.54                                                               | 0.095                    | 0.905            | 3.13 ± 0.16                                                                          |
|         | 50.8       | 1.65                                              | 1.93                                                               | 0.118                    | 0.882            | 3.29 ± 0.15                                                                          |
|         | 52.3       | 1.69                                              | 2.53                                                               | 0.149                    | 0.851            | 3.65 ± 0.12                                                                          |
|         | 51.6       | 1.67                                              | 2.87                                                               | 0.172                    | 0.828            | 3.79 ± 0.34                                                                          |
|         | 50.4       | 1.63                                              | 3.02                                                               | 0.185                    | 0.815            | 4.14 ± 0.42                                                                          |
| 54.8    | 1.78       | 3.41                                              | 0.192                                                              | 0.808                    | 4.18 ± 0.13      |                                                                                      |
| 333     | 49.9       | 1.45                                              | 0.00                                                               | 0.000                    | 1.000            | 1.70 ± 0.04                                                                          |
|         | 50.0       | 1.45                                              | 0.36                                                               | 0.025                    | 0.975            | 1.89 ± 0.11                                                                          |
|         | 50.1       | 1.45                                              | 0.70                                                               | 0.048                    | 0.952            | 1.96 ± 0.07                                                                          |
|         | 50.6       | 1.47                                              | 0.74                                                               | 0.050                    | 0.950            | 2.11 ± 0.15                                                                          |
|         | 50.2       | 1.46                                              | 1.17                                                               | 0.081                    | 0.919            | 2.32 ± 0.20                                                                          |
|         | 50.2       | 1.46                                              | 1.39                                                               | 0.095                    | 0.905            | 2.23 ± 0.18                                                                          |
|         | 50.2       | 1.46                                              | 1.96                                                               | 0.135                    | 0.865            | 2.20 ± 0.14                                                                          |
|         | 49.8       | 1.44                                              | 2.13                                                               | 0.148                    | 0.852            | 2.36 ± 0.34                                                                          |
|         | 50.2       | 1.46                                              | 2.49                                                               | 0.171                    | 0.829            | 2.65 ± 0.37                                                                          |

<sup>1</sup> H<sub>2</sub>O<sub>2</sub> was used as OH precursor in all measurements.

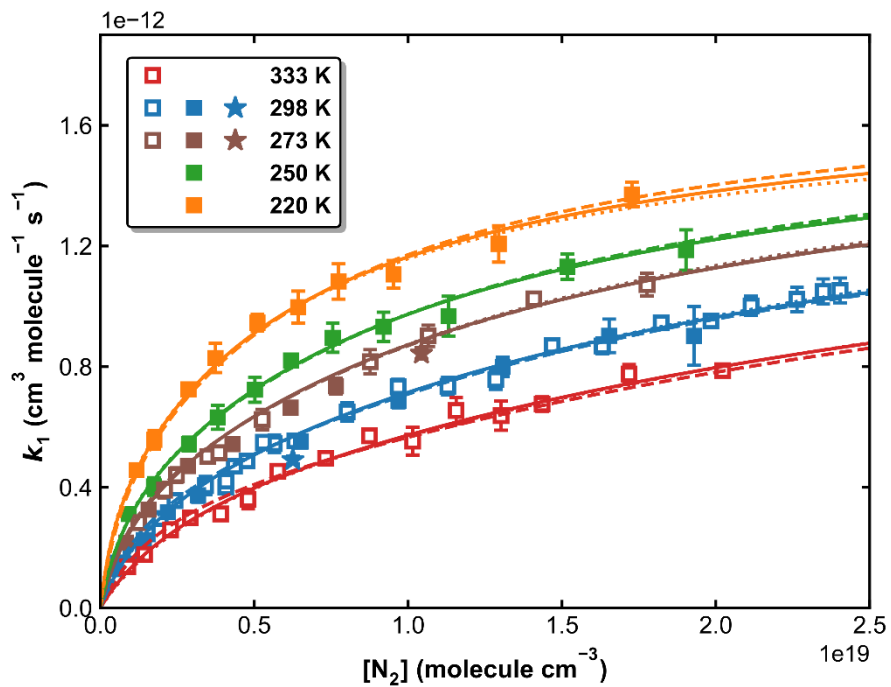

**Figure S1.** Measured (symbols)  $k_1$  in  $N_2$  bath gas and parameterization using different methods listed in **Table 2** (Method 1: solid lines; Method 2: dashed lines; Method 3: dotted lines).

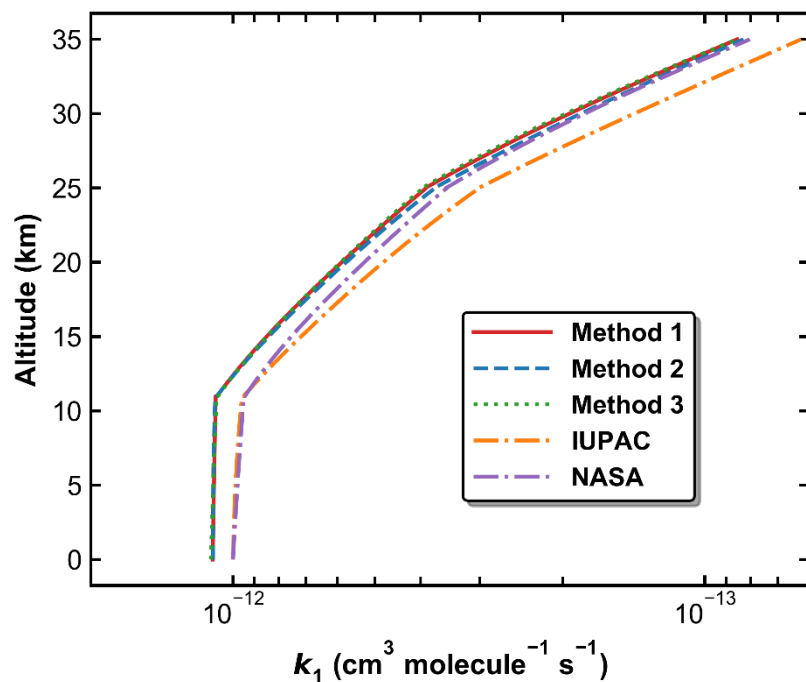

**Figure S2.** Parameterized  $k_1$  in  $N_2$  bath gas using the three different methods listed in **Table 2** at different altitudes with pressure and temperature calculated using parameters given in an Earth atmosphere model (<https://www.grc.nasa.gov/www/BGH/atmosmet.html>) and the comparison with the IUPAC and NASA recommendations.

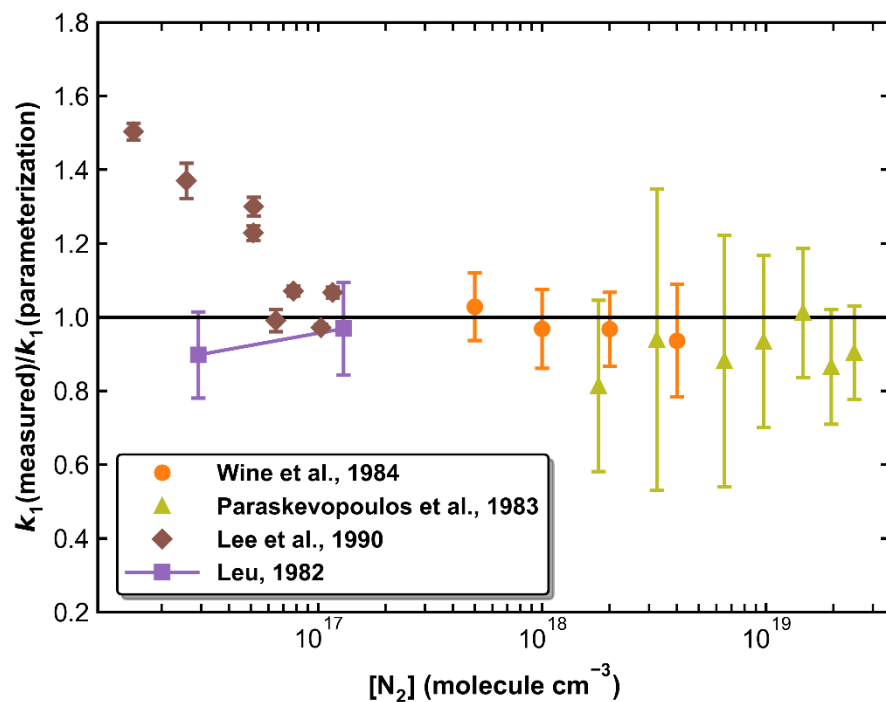

**Figure S3.** The ratio of rate coefficients obtained in N<sub>2</sub> bath-gas reported by (Leu, 1982; Paraskevopoulos et al., 1983; Wine et al., 1984; Lee et al., 1990) to the current parameterization as a function of N<sub>2</sub> molecular density at around 298 K.



## Further parameterization methods for termolecular reactions

The NASA evaluation panel uses a simplified form of the Troe expression for termolecular reactions, with

$$k_{NASA}(P, T) = \frac{k_0 \left(\frac{T}{298}\right)^{-n} [M]}{1 + \frac{k_0 \left(\frac{T}{298}\right)^{-n} [M]}{k_\infty \left(\frac{T}{298}\right)^{-m}}} 0.6 \left\{ 1 + \left[ \log \left( \frac{k_0 \left(\frac{T}{298}\right)^{-n} [M]}{k_\infty \left(\frac{T}{298}\right)^{-m}} \right) \right]^2 \right\}^{-1} \quad (\text{S1})$$

where  $[M]$  = molecular density (in molecule  $\text{cm}^{-3}$ ),  $T$  is in kelvin. This expression should be used when inputting the “NASA” parameters from **Table 2**.

(Blitz et al., 2017) used a more detailed form of Troe expression (Troe and Ushakov, 2014) which is applicable to the cases of “broad” fall-off curves and characterized by the following equations:

$$\frac{k}{k_\infty \left(\frac{T}{298}\right)^{-m}} = \frac{x}{1+x} F(x) \quad (\text{S2})$$

where

$$x = \frac{k_0 (T/298)^{-n}}{k_\infty (T/298)^{-m}} [M] \quad (\text{S3})$$

and

$$F(x) = \left(1 + \frac{x}{x_0}\right) / \left[1 + (x/x_0)^p\right]^{\frac{1}{p}} \quad (\text{S4})$$

with

$$p = \left[ \frac{\ln 2}{\ln \left(\frac{2}{F_C}\right)} \right] \left[ 1 - b + b \left(\frac{x}{x_0}\right)^q \right] \quad (\text{S5})$$

where

$$q = (F_C - 1) / \ln(F_C/10) \quad (\text{S6})$$

Besides those listed in **Table 2**, the parameters  $x_0 = 0.94$  and  $b = 0.19$  are also required (Personal communication with Mark Blitz).

### Parametrization for $k_1$ in N<sub>2</sub>-H<sub>2</sub>O bath using different $F_C$ for N<sub>2</sub> and H<sub>2</sub>O

According to the approach proposed by Burke and Song (Burke and Song, 2017), the broadening factor for a gas-mixture can also be expressed by the weighed sum of the broadening factors in the two individual bath gases, in this case N<sub>2</sub> and H<sub>2</sub>O:

$$\log F^{\text{N}_2\text{-H}_2\text{O}} = X_{\text{N}_2} \log F^{\text{N}_2} + X_{\text{H}_2\text{O}} \log F^{\text{H}_2\text{O}} \quad (\text{S1})$$

where

$$\log F^{\text{N}_2} = \frac{\log F_C^{\text{N}_2}}{1 + [\log(\frac{(x_{\text{N}_2} k_{1,0}^{\text{N}_2} (\frac{T}{300})^{-n} + x_{\text{H}_2\text{O}} k_{1,0}^{\text{H}_2\text{O}} (\frac{T}{300})^{-o}) [M]}{k_\infty (\frac{T}{300})^{-m}})] / (0.75 - 1.27 \log F_C^{\text{N}_2})]^2} \quad (\text{S2})$$

$$\log F^{\text{H}_2\text{O}} = \frac{\log F_C^{\text{H}_2\text{O}}}{1 + [\log(\frac{(x_{\text{N}_2} k_{1,0}^{\text{N}_2} (\frac{T}{300})^{-n} + x_{\text{H}_2\text{O}} k_{1,0}^{\text{H}_2\text{O}} (\frac{T}{300})^{-o}) [M]}{k_\infty (\frac{T}{300})^{-m}})] / (0.75 - 1.27 \log F_C^{\text{H}_2\text{O}})]^2} \quad (\text{S3})$$

, and the weights for the N<sub>2</sub> and the H<sub>2</sub>O terms are characterized by:

$$X_{\text{N}_2} = \frac{x_{\text{N}_2} k_{1,0}^{\text{N}_2} (\frac{T}{300})^{-n} [M]}{(x_{\text{N}_2} k_{1,0}^{\text{N}_2} (\frac{T}{300})^{-n} + x_{\text{H}_2\text{O}} k_{1,0}^{\text{H}_2\text{O}} (\frac{T}{300})^{-o}) [M]} \quad (\text{S4})$$

$$X_{\text{H}_2\text{O}} = \frac{x_{\text{H}_2\text{O}} k_{1,0}^{\text{H}_2\text{O}} (\frac{T}{300})^{-o} [M]}{(x_{\text{N}_2} k_{1,0}^{\text{N}_2} (\frac{T}{300})^{-n} + x_{\text{H}_2\text{O}} k_{1,0}^{\text{H}_2\text{O}} (\frac{T}{300})^{-o}) [M]} \quad (\text{S5})$$

where  $F_C^{\text{N}_2}$  and  $F_C^{\text{H}_2\text{O}}$  are the broadening factors at the center of the fall-off curves of N<sub>2</sub> and H<sub>2</sub>O, respectively.

If a value of 0.6 (normally an upper limit for  $F_C$  in IUPAC evaluations) is used for  $F_C^{\text{H}_2\text{O}}$ , the fitting with Eqs. (5), (S1)–(S5) would give  $k_{1,0}^{\text{H}_2\text{O}} = 1.56 \times 10^{-30} \text{ cm}^6 \text{ molecule}^{-2} \text{ s}^{-1}$ , which is about 5.5% lower than the value derived through the first method, and  $o = 4.80$ . For the current SO<sub>2</sub>+OH case, since our preferred  $F_C^{\text{N}_2}$  value of 0.58 is close to 0.6, the resulting  $k_{1,0}^{\text{H}_2\text{O}}$ s derived via the two different methods are similar.

## References

- Blitz, M. A., Salter, R. J., Heard, D. E., and Seakins, P. W.: An Experimental and Master Equation Study of the Kinetics of OH/OD+ SO<sub>2</sub>: The Limiting High-Pressure Rate Coefficients, *J. Phys. Chem. A*, 121, 3184-3191, doi:10.1021/acs.jpca.7b01295, 2017.
- Burke, M. P. and Song, R.: Evaluating mixture rules for multi-component pressure dependence: H + O<sub>2</sub> (+ M) = HO<sub>2</sub> (+ M), *Proc. Combust. Inst.*, 36, 245-253, doi:10.1016/j.proci.2016.06.068, 2017.
- Lee, Y. Y., Kao, W. C., and Lee, Y. P.: Kinetics of the reaction hydroxyl + sulfur dioxide in helium, nitrogen, and oxygen at low pressure, *J. Phys. Chem.*, 94, 4535-4540, doi:10.1021/j100374a035, 1990.
- Leu, M. T.: Rate constants for the reaction of hydroxyl with sulfur dioxide at low pressure, *J. Phys. Chem.*, 86, 4558-4562, doi:10.1021/es00120a014, 1982.
- Paraskevopoulos, G., Singleton, D. L., and Irwin, R. S.: Rates of OH radical reactions. The reaction OH+ SO<sub>2</sub>+ N<sub>2</sub>, *Chem. Phys. Lett.*, 100, 83-87, doi:10.1016/0009-2614(83)87267-4, 1983.
- Troe, J. and Ushakov, V. G.: Representation of “broad” falloff curves for dissociation and recombination reactions, *Z. Phys. Chem.*, 228, 1-10, doi:10.1515/zpch-2014-04, 2014.
- Wine, P., Thompson, R., Ravishankara, A., Semmes, D., Gump, C., Torabi, A., and Nicovich, J.: Kinetics of the reaction OH+ SO<sub>2</sub> + M. forward. HOSO<sub>2</sub> + M. Temperature and pressure dependence in the fall-off region, *J. Phys. Chem.*, 88, 2095-2104, doi:10.1021/j150654a031, 1984.
